# Supplementary material for: Large Differences in Aging Phenotype between Strains of the Short-Lived Annual Fish Nothobranchius furzeri
Source: PubMed Central journal article supplement (PMC2585814; doi:10.1371/journal.pone.0003866), 2008-12-04
Supplement: pone.0003866.s002.pdf [file pone.0003866.s002.pdf]

## Supp. Fig. 2

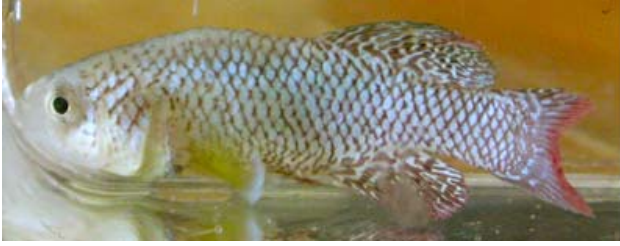

six-months old

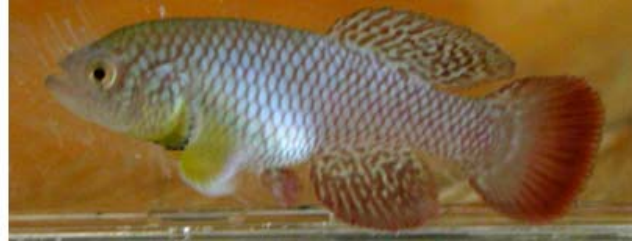

Six-weeks old

Phenotypic differences between young and old males of the MZM-04/03 line. Note emaciation and curved spine in the old fish. From Genade et al., (2005)
